# Supplementary material for: Particulate Air Pollution, Clock Gene Methylation, and Stroke: Effects on Stroke Severity and Disability
Source: PubMed Central journal article supplement (PMC7247663; doi:10.3390/ijms21093090), 2020-04-27

**Supplementary table 1.** Mean levels of gene methylation (%5mC) of the studied population (N=55).

| <b>Methylation %5mC</b> | <b>Value</b> |
|-------------------------|--------------|
| ARNTL                   | 1.24 ± 0.81  |
| CLOCK                   | 1.5 ± 0.83   |
| NPAS2                   | 3.34 ± 1.24  |
| CRY1                    | 1.24 ± 0.4   |
| CRY2                    | 1.2 ± 0.2    |
| PER1                    | 1.44 ± 0.65  |
| PER2                    | 74.32 ± 6.71 |
| PER3                    | 82.71 ± 7.21 |

**Supplementary table 2.** Association between PM<sub>2.5</sub> exposure and clock genes methylation.

| clock gene methylation | PM <sub>2.5</sub>   | $\beta$        | SE            | 95% CI                 | P-value       |
|------------------------|---------------------|----------------|---------------|------------------------|---------------|
| ARNTL                  | Day -1              | -0.0021        | 0.0074        | -0.0171 0.0129         | 0.7794        |
|                        | Day -2              | -0.0055        | 0.0057        | -0.0170 0.0060         | 0.3356        |
|                        | Day -3              | -0.0025        | 0.0050        | -0.0126 0.0077         | 0.6233        |
|                        | Day -4              | -0.0134        | 0.0085        | -0.0306 0.0039         | 0.1236        |
|                        | Day -5              | -0.0039        | 0.0050        | -0.0141 0.0063         | 0.4395        |
|                        | Day -6              | -0.0019        | 0.0069        | -0.0159 0.0121         | 0.7827        |
|                        | Day -7              | -0.0002        | 0.0086        | -0.0179 0.0174         | 0.9778        |
|                        | 0 - 6 months        | 0.0082         | 0.0139        | -0.0199 0.0363         | 0.5588        |
|                        | 0 - 12 months       | -0.1139        | 0.0787        | -0.2735 0.0457         | 0.1565        |
| CLOCK                  | Day -1              | -0.0075        | 0.0054        | -0.0184 0.0033         | 0.1678        |
|                        | Day -2              | -0.0053        | 0.0044        | -0.0142 0.0037         | 0.2386        |
|                        | Day -3              | -0.0038        | 0.0039        | -0.0118 0.0041         | 0.3354        |
|                        | <b>Day -4</b>       | <b>-0.0150</b> | <b>0.0060</b> | <b>-0.0272 -0.0027</b> | <b>0.0180</b> |
|                        | Day -5              | -0.0032        | 0.0039        | -0.0113 0.0048         | 0.4209        |
|                        | Day -6              | -0.0042        | 0.0052        | -0.0148 0.0064         | 0.4299        |
|                        | Day -7              | -0.0009        | 0.0067        | -0.0146 0.0128         | 0.8909        |
|                        | 0 - 6 months        | 0.0176         | 0.0105        | -0.0037 0.0389         | 0.1029        |
|                        | 0 - 12 months       | -0.0359        | 0.0632        | -0.1639 0.0920         | 0.5727        |
| NPAS2                  | Day -1              | -0.0096        | 0.0147        | -0.0404 0.0212         | 0.5205        |
|                        | Day -2              | -0.0029        | 0.0104        | -0.0248 0.0189         | 0.7823        |
|                        | Day -3              | -0.0006        | 0.0106        | -0.0227 0.0214         | 0.9546        |
|                        | Day -4              | 0.0066         | 0.0175        | -0.0303 0.0434         | 0.7114        |
|                        | <b>Day -5</b>       | <b>0.0213</b>  | <b>0.0073</b> | <b>0.0060 0.0367</b>   | <b>0.0093</b> |
|                        | Day -6              | 0.0211         | 0.0127        | -0.0055 0.0477         | 0.1128        |
|                        | Day -7              | 0.0209         | 0.0157        | -0.0121 0.0538         | 0.1996        |
|                        | 0 - 6 months        | -0.0015        | 0.0275        | -0.0589 0.0558         | 0.9558        |
|                        | 0 - 12 months       | -0.2018        | 0.1377        | -0.4891 0.0855         | 0.1583        |
| CRY1                   | Day -1              | -0.0006        | 0.0033        | -0.0076 0.0064         | 0.8557        |
|                        | Day -2              | -0.0013        | 0.0026        | -0.0067 0.0041         | 0.6264        |
|                        | Day -3              | 0.0029         | 0.0029        | -0.0031 0.0088         | 0.3250        |
|                        | Day -4              | 0.0066         | 0.0041        | -0.0020 0.0152         | 0.1260        |
|                        | <b>Day -5</b>       | <b>0.0043</b>  | <b>0.0020</b> | <b>0.0001 0.0084</b>   | <b>0.0461</b> |
|                        | Day -6              | 0.0056         | 0.0031        | -0.0009 0.0122         | 0.0887        |
|                        | Day -7              | 0.0063         | 0.0034        | -0.0008 0.0134         | 0.0804        |
|                        | <b>0 - 6 months</b> | <b>0.0169</b>  | <b>0.0066</b> | <b>0.0031 0.0306</b>   | <b>0.0189</b> |
|                        | 0 - 12 months       | 0.0350         | 0.0393        | -0.0470 0.1170         | 0.3834        |
| CRY2                   | Day -1              | 0.0026         | 0.0021        | -0.0017 0.0069         | 0.2205        |
|                        | Day -2              | -0.0012        | 0.0015        | -0.0043 0.0019         | 0.4282        |
|                        | Day -3              | -0.0014        | 0.0015        | -0.0045 0.0017         | 0.3665        |
|                        | Day -4              | -0.0034        | 0.0024        | -0.0085 0.0017         | 0.1812        |
|                        | Day -5              | -0.0008        | 0.0011        | -0.0031 0.0015         | 0.4770        |
|                        | Day -6              | 0.0007         | 0.0020        | -0.0034 0.0048         | 0.7234        |
|                        | Day -7              | 0.0000         | 0.0024        | -0.0050 0.0050         | 0.9849        |

|               |               |                |               |                |                |               |
|---------------|---------------|----------------|---------------|----------------|----------------|---------------|
|               | 0 - 6 months  | -0.0010        | 0.0040        | -0.0093        | 0.0074         | 0.8117        |
|               | 0 - 12 months | -0.0179        | 0.0207        | -0.0610        | 0.0253         | 0.3975        |
| <b>PER1</b>   | Day -1        | 0.0011         | 0.0045        | -0.0082        | 0.0103         | 0.8179        |
|               | Day -2        | -0.0040        | 0.0038        | -0.0117        | 0.0038         | 0.3046        |
|               | Day -3        | -0.0015        | 0.0035        | -0.0086        | 0.0056         | 0.6705        |
|               | Day -4        | 0.0034         | 0.0062        | -0.0092        | 0.0160         | 0.5847        |
|               | Day -5        | -0.0020        | 0.0028        | -0.0078        | 0.0038         | 0.4867        |
|               | Day -6        | -0.0013        | 0.0042        | -0.0100        | 0.0073         | 0.7567        |
|               | Day -7        | -0.0036        | 0.0053        | -0.0145        | 0.0074         | 0.5119        |
|               | 0 - 6 months  | 0.0064         | 0.0093        | -0.0125        | 0.0253         | 0.4986        |
| 0 - 12 months | -0.0302       | 0.0541         | -0.1399       | 0.0796         | 0.5807         |               |
| <b>PER2</b>   | Day -1        | 0.0112         | 0.0532        | -0.0969        | 0.1192         | 0.8350        |
|               | Day -2        | -0.0333        | 0.0412        | -0.1170        | 0.0504         | 0.4248        |
|               | Day -3        | -0.0344        | 0.0333        | -0.1019        | 0.0332         | 0.3089        |
|               | <b>Day -4</b> | <b>-0.1208</b> | <b>0.0539</b> | <b>-0.2306</b> | <b>-0.0111</b> | <b>0.0319</b> |
|               | Day -5        | -0.0100        | 0.0257        | -0.0623        | 0.0424         | 0.7008        |
|               | Day -6        | 0.0212         | 0.0441        | -0.0686        | 0.1111         | 0.6337        |
|               | Day -7        | 0.0307         | 0.0563        | -0.0843        | 0.1457         | 0.5896        |
|               | 0 - 6 months  | -0.0606        | 0.1012        | -0.2657        | 0.1446         | 0.5533        |
| 0 - 12 months | -0.9299       | 0.5711         | -2.0871       | 0.2274         | 0.1120         |               |
| <b>PER3</b>   | Day -1        | 0.0477         | 0.0807        | -0.1234        | 0.2188         | 0.5628        |
|               | Day -2        | 0.0284         | 0.0566        | -0.0911        | 0.1478         | 0.6228        |
|               | Day -3        | 0.0270         | 0.0573        | -0.0935        | 0.1474         | 0.6439        |
|               | Day -4        | 0.1193         | 0.0917        | -0.0751        | 0.3137         | 0.2118        |
|               | Day -5        | -0.0036        | 0.0501        | -0.1099        | 0.1027         | 0.9437        |
|               | Day -6        | -0.0314        | 0.0766        | -0.1931        | 0.1303         | 0.6870        |
|               | Day -7        | 0.0113         | 0.0890        | -0.1773        | 0.2000         | 0.9003        |
|               | 0 - 6 months  | 0.1376         | 0.1525        | -0.1827        | 0.4579         | 0.3787        |
| 0 - 12 months | 0.3757        | 0.7720         | -1.2461       | 1.9975         | 0.6324         |               |

Linear mixed models were adjusted for age, gender, smoking habits, warm/cold months (months with heaters switched on/off) run, position and plate.

**Supplementary table 3.** Association between PM<sub>2.5</sub> exposure and NIH-STROKE SCALE (NIHSS) and Modified Rankin Scale for Neurologic Disability.

|                              | PM <sub>2.5</sub> | Δ%    | 95% CI |       | P-value |
|------------------------------|-------------------|-------|--------|-------|---------|
| <b>NIHSS score</b>           | Day -1            | 0,61  | -0,48  | 1,70  | 0,2627  |
|                              | Day -2            | 0,18  | -0,63  | 1,01  | 0,6483  |
|                              | Day -3            | -0,08 | -0,81  | 0,65  | 0,8227  |
|                              | Day -4            | -0,61 | -1,86  | 0,65  | 0,3306  |
|                              | Day -5            | -0,19 | -0,88  | 0,49  | 0,5682  |
|                              | Day -6            | 0,04  | -0,89  | 0,97  | 0,9363  |
|                              | Day -7            | -0,31 | -1,53  | 0,94  | 0,6166  |
|                              | 0 - 6 months      | -1,12 | -3,02  | 0,81  | 0,2428  |
|                              | 0 - 12 months     | 0,24  | -11,18 | 13,12 | 0,9684  |
| <b>Modified Rankin score</b> | Day -1            | 0,38  | -1,01  | 1,80  | 0,5684  |
|                              | Day -2            | -0,10 | -1,10  | 0,91  | 0,8323  |
|                              | Day -3            | 0,75  | -1,07  | 2,60  | 0,4011  |
|                              | Day -4            | 0,41  | -1,32  | 2,18  | 0,6229  |
|                              | Day -5            | 0,60  | -1,37  | 2,62  | 0,5288  |
|                              | Day -6            | -0,60 | -2,61  | 1,46  | 0,5460  |
|                              | Day -7            | -0,30 | -1,92  | 1,36  | 0,7077  |
|                              | 0 - 6 months      | -1,16 | -3,64  | 1,38  | 0,3462  |
|                              | 0 - 12 months     | 1,87  | -14,88 | 21,93 | 0,8305  |

Linear regression models were adjusted for age, gender, smoking habits, diabetes, hypertension and warm/cold months (months with heaters switched on/off) and therapy (only for Ranking score). Scores were log (base e) transformed to achieve a normal distribution. Δ% is equal to  $(\exp(\beta) - 1) * 100$  and represents the percentage increase in NIHSS or Ranking score for 1 μg/m<sup>3</sup> increase in PM<sub>2.5</sub>.

**Supplementary Table 4.** Pyrosequencing assay information. For all genes assembly hg19 was used in UCSC genome browser, with the exception of CRY1 where assembly hg18 was used.

| <b>Gene</b>  | <b>Chromosome and region</b> | <b>CpG loci</b> | <b>Primers: Forward (F), Reverse (R) and Sequencing (S)</b>                                         | <b>Sequencing length</b> |
|--------------|------------------------------|-----------------|-----------------------------------------------------------------------------------------------------|--------------------------|
| <b>ARNTL</b> | chr11:13297365-13299374      | 2               | F: TAGGGGATTTAGAGAAGAGGGATAT<br>R: biotin- ACTACTTTCCTACCACCAATCATTTAA<br>S: TTATTTTATTTTATTTTAGT   | 38 bp                    |
| <b>CLOCK</b> | chr4:56413309-56413697       | 3               | F: TTTTAGGAGATGGGAGAAGATGT<br>R: biotin- TAAAAAATCCAAAAACCAAAAAA<br>S: TTTTGTGTTAATATT              | 28 bp                    |
| <b>NPAS2</b> | chr2:101435534-101435968     | 3               | F: GGGAATTTTGGTAAAATTTTTTTT<br>R: biotin- CTCCTCTCCTTTACACCAATACAA<br>S: GGGAATTTTGGTAAAATTTTTTTT   | 28 bp                    |
| <b>CRY1</b>  | chr12:106011400-106012370    | 3               | F: TTTGTGAGGGAAGGTTYAGTTT<br>R: biotin- AACAATTTCCAAACCCTCC<br>S: TTTTAAAGGGTTATGAG                 | 27 bp                    |
| <b>CRY2</b>  | chr11:45868457-45869129      | 4               | F: TGTTTTTTGAGATTTGGTTTATTTT<br>R: biotin- TAGTTAATGGTAGAGGGGTTTTGG<br>S: TGTTTTTTGAGATTTGGTTTATTTT | 33 bp                    |
| <b>PER1</b>  | chr17:8055042-8055979        | 3               | F: TAGGGTTAGGGATTGGAGAATAGA<br>R: biotin- ACCCAAACAAAAACACACTATC<br>S: GGGTTAGGAGTGTAGATTTT         | 27 bp                    |
| <b>PER2</b>  | chr2:239196677-239199714     | 3               | F: TGAGAAAGGTAGTATTTTTAAGG<br>R: biotin- AAAACTCCACATACCCACAC<br>S: AGGAGGTTGTTTTGGGAGAT            | 34 bp                    |
| <b>PER3</b>  | chr1:7844128-7845255         | 3               | F: TGTTTGTTATTGATTGTAAAGTGAG<br>R: biotin- GTAGGGAAAGGGGATTTAAATT<br>S: TGTTTGTTATTGATTGTAAAGTGAG   | 25 bp                    |

**Supplementary Figure 1.** Box plot showing the distribution of PM<sub>2.5</sub> concentrations for the exposure intervals defined

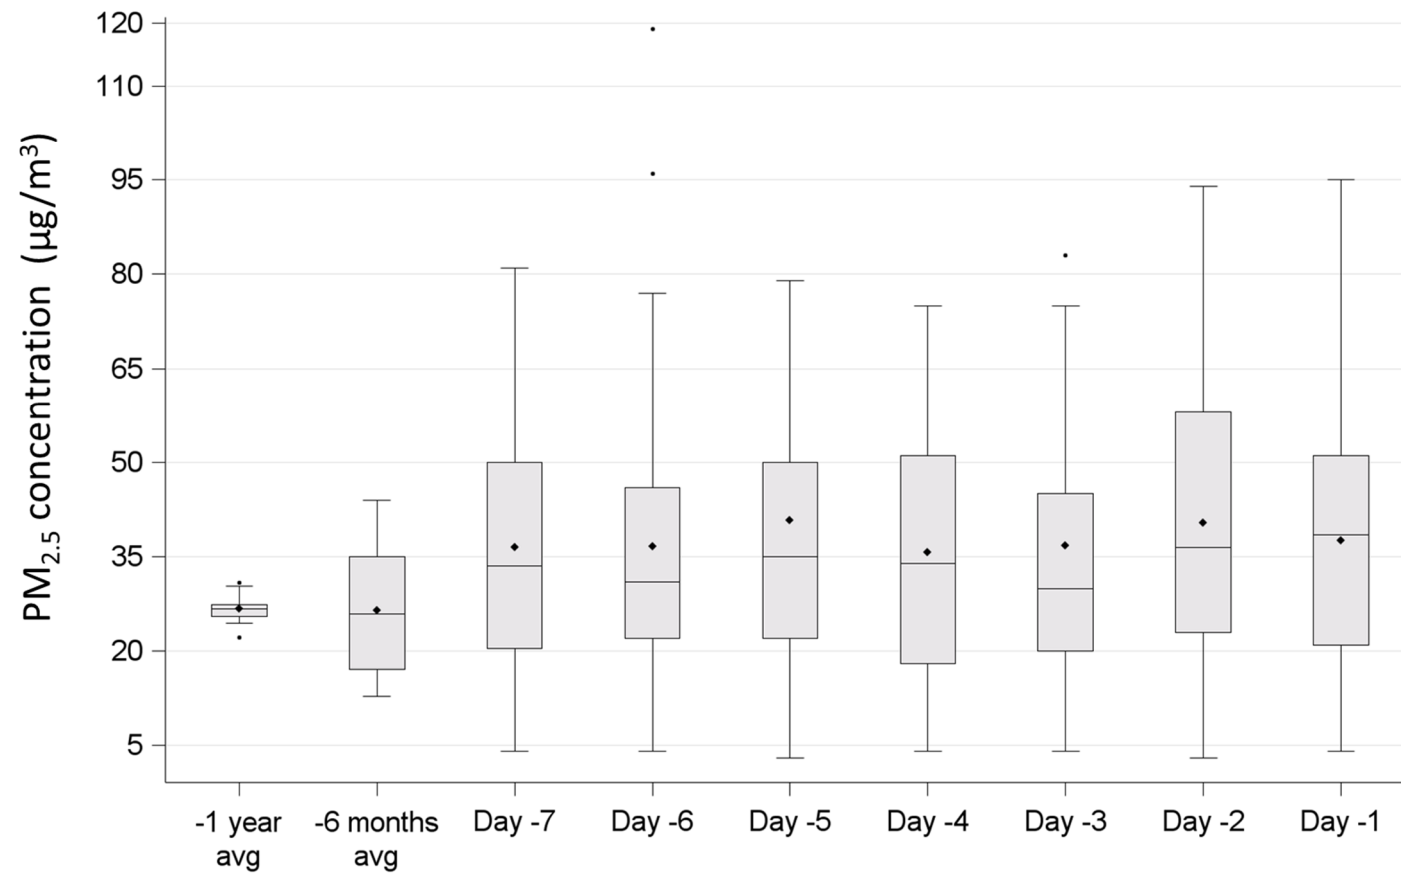

Supplement: ijms-21-03090-s001.pdf [file ijms-21-03090-s001.pdf]
